# Supplementary material for: High-Throughput Sequencing of Phage Display Libraries Reveals Parasitic Enrichment of Indel Mutants Caused by Amplification Bias
Source: MDPI journal article supplement (doi:10.3390/ijms22115513), 2021-05-24
Supplement: s1 [file s1]

# Supporting Information for High-Throughput Sequencing of Phage Display Libraries Reveals Parasitic Enrichment of Indel Mutants Caused by Amplification Bias

Sander Plessers <sup>1</sup>, Vincent Van Deuren <sup>1</sup>, Rob Lavigne <sup>2</sup> and Johan Robben <sup>1,\*</sup>

## Table of Content

|                                                                                                                                               |     |
|-----------------------------------------------------------------------------------------------------------------------------------------------|-----|
| <b>Figure S1.</b> Schematic representation of the <i>alkB</i> and <i>FTO</i> fusion constructs in pDST32 used for phage display .....         | 2   |
| <b>Figure S2.</b> Restriction analysis of naive and selected <i>FTO</i> phagemid pools. ....                                                  | 3   |
| <b>Figure S3.</b> Doubling time of liquid-cultured TG1 cells bearing pDST32- <i>FTO</i> or pDST32- $\Delta$ sfgIII phagemids .....            | 4   |
| <b>Figure S4.</b> Cloned coding sequence of <i>E. coli</i> <i>AlkB</i> and human <i>FTO</i> .....                                             | 5   |
| <b>Figure S5.</b> Construction schemes of <i>AlkB</i> and <i>FTO</i> libraries.....                                                           | 6-7 |
| <b>Figure S6.</b> Detailed overview of the targeted regions and randomized codons in <i>alkB</i> and <i>FTO</i> .....                         | 8   |
| <b>Figure S7.</b> Sequence coverage of the <i>alkB</i> and <i>FTO</i> gene after deep sequencing.....                                         | 9   |
| <b>Figure S8.</b> Evolution of amino acids at randomized positions in <i>AlkB</i> and <i>FTO</i> during biopanning.....                       | 10  |
| <b>Figure S9.</b> NanoPlot bivariate plot of linearized pDST32- <i>FTO</i> nanopore read lengths against average read quality.....            | 11  |
| <b>Figure S10.</b> NanoPlot histogram of raw nanopore read lengths of <i>AlkB</i> phagemid libraries                                          | 12  |
| <b>Figure S11.</b> NanoPlot histogram of raw nanopore read lengths of <i>FTO</i> phagemid libraries .                                         | 13  |
| <b>Table S1.</b> Absolute numbers of sequence reads and read pairs in consecutive steps of FASTQ processing. ....                             | 14  |
| <b>Table S2.</b> Frequency evolution of most prominent <i>AlkB</i> and <i>FTO</i> amino acid patterns deduced from deep sequencing reads..... | 15  |
| <b>Table S3.</b> Observed <i>alkB</i> and <i>FTO</i> genotype frequencies and diversities of enriched canonical phenotypes. ....              | 17  |
| <b>Table S4.</b> Oligonucleotides used in this study.....                                                                                     | 19  |

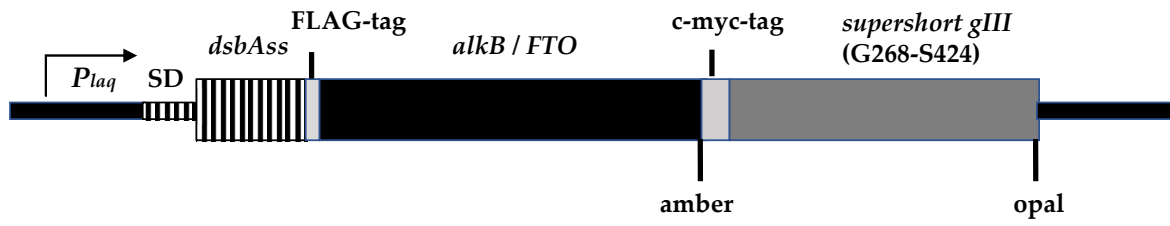

**Figure S1.** Schematic representation of the *alkB* and *FTO* fusion constructs in pDST32 used for phage display.

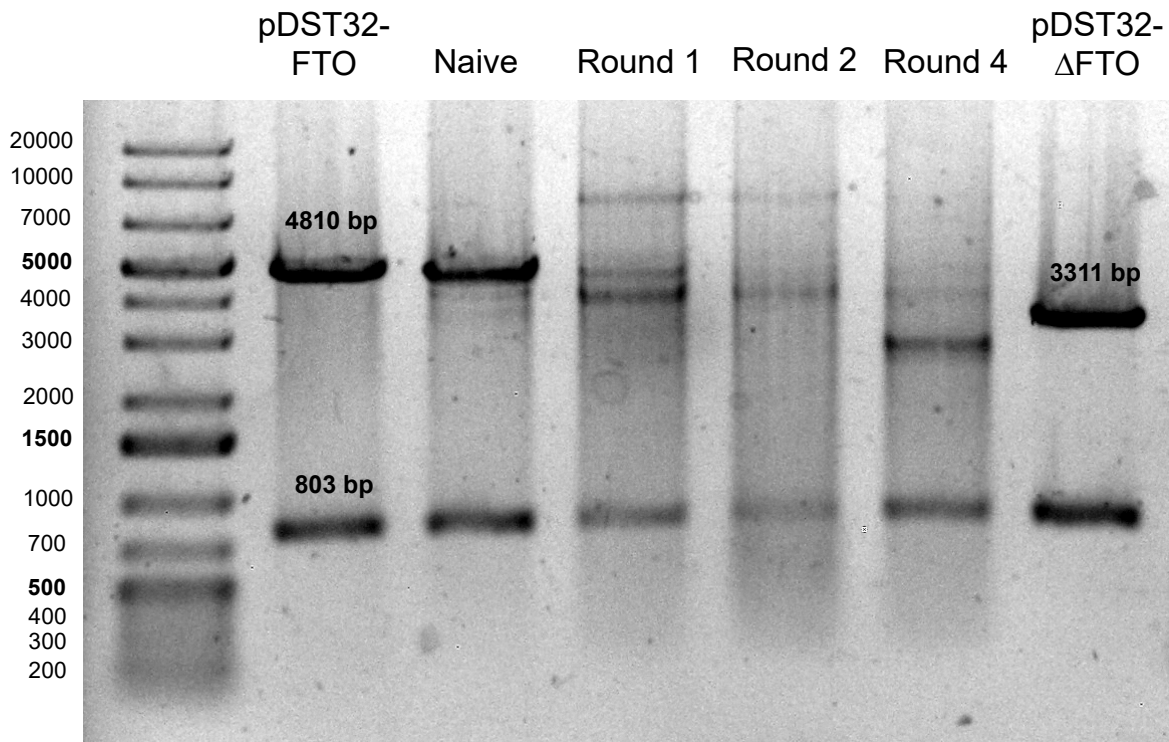

**Figure S2.** Restriction analysis of naive and selected FTO phagemid pools. Phagemid DNA isolated from library-transfected TG1 cell cultures (naive and round 1, 2 and 4 libraries) were cut by *ScaI* and *NheI* double-digestion. This generates an 803 bp fragment containing the origin of replication and part of the *cat* resistance marker, and an expected 4810 bp fragment containing the *FTO-ssgIII* expression module. Plasmids pDST32-FTO and pDST32-ΔFTO were used as size controls.

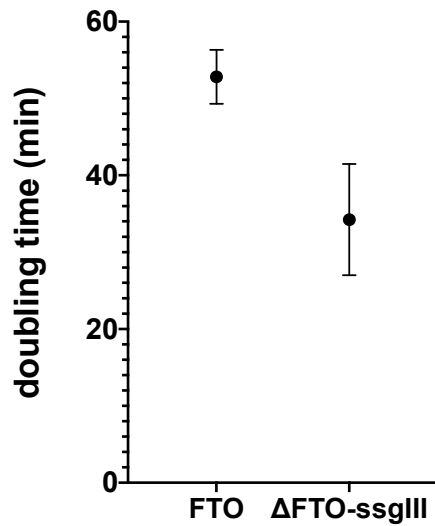

**Figure S3.** Doubling time of liquid-cultured TG1 cells bearing pDST32-FTO or pDST32- $\Delta$ ssgIII phagemids. The OD of each cell culture was monitored for 10 hours and the doubling time was determined by plotting  $\ln(\text{OD})$  in function of time and calculating the slope of the linear part of the curve. Data are the means of three biological and three technical replicates.

**AlkB**

atg ttg gat ctg ttt gcc gat gct gaa ccg tgg caa gag cca ctg gcg gct ggt gcg gta  
att tta cgg cgt ttt gct ttt aac gct gcg gag caa ctg atc cgc gat att aat gac gtt  
gcc agc cag tgc ccg ttt cgc cag atg gtc acc ccc ggg gga tat acc atg Tcg gtg gcg  
atg acc aac tgt ggg cat ctg ggc tgg acg acc cat cgg caa ggt tat ctc tat tgc ccc  
att gat ccg caa aca aat aaa ccg tgg ccc gcc atg cca cag agt ttt cat aat tta tgt  
caa cgt gcg gct acg gcg gcg ggc tat cca gat ttc cag cca gat gct tgt ctt atc aac  
cgc tac gct cct ggc gcg aaa ctg tgc ctg cat cag gat aaa gac gaa ccg gat ctg cgc  
gcg cca att gtt tct gtt tct ctg ggc tta ccc gcg att ttt caa ttt ggc ggc ctg aaa  
cga aat gat ccg ctc aaa cgt ttg ttg ttg gaa cat ggc gat gtg gtg gta tgg ggc ggt  
gaa tgc cgg ctg ttt tat cac ggt att caa ccg ttg aaa gcg ggg ttt cat cca ctc acc  
atc gac tgc cgc tac aac ctg aca ttc cgt cag gca ggt aaa aaa gaa taa

**FTO**

atg ggg aag cgc acc ccg act gcc gag gaa cga gag cgc gaa gct aag aaa ctg agg ctt  
ctt gaa gag ctt gaa gac act tgg ctc cct tat ctg acc ccc aaa gat gat gaa ttt tat  
cag cag tgg cag ctg aaa tat cct aaa cta att ctc cga gaa gcc agc agt gta tct gag  
gag ctc cat aaa gag gtt caa gaa gcc ttt ctc aca ctg cac aag cat ggc tgc tta ttt  
cgg gac ctg gtt cga atc caa ggc aaa gac ctg ctc act ccg gta tct cgc atc ctc att  
ggt aat cca ggc tgc acc tac aag tac ctg aac acc agg ctc ttt acg gta ccc tgg cca  
gtg aaa ggg tct aat ata aaa cac acc gag gct gaa ata gcc gct gct tgt gag acc ttc  
ctc aag ctc aat gac tac ctg cag ata gaa acc atc cag gct ttg gaa gaa ctt gct gcc  
aaa gag aag gct aat gag gat gct gtg cca ttg tgt atg tct gca gat ttc ccc agg gtt  
ggg atg ggt tca tcc tac aac gga caa gat gaa gtc gac att aag agc aga gca gca tac  
aac gta acg ttg ctg aat ttc atg gac cct cag aaa atg cca tac ctg aaa gag gaa cct  
tat ttt ggc atg ggg aaa atg gca gtg agc tgg cat cat gat gaa aat ctg gtg gac agg  
tcc gcg gtg gca gtg tac agt tat agc tgt gaa ggc cct gaa gag gaa agt gag gat gac  
tct cat ctc gaa ggc cgt gat cct gat att tgg cat gtt ggt ttt aag atc tca tgg gac  
ata gag aca cct ggt ttg gcg ata ccc ctt cac caa gga gac tgc tat ttc atg ctt gat  
gat ctc aat gcc acc cac caa cac tgt gtg ttg gcc ggt tca caa cct cgg ttt agt tcc  
acc cac cga gtt gca gag tgc tca acc ggt aca ttg gat tat att tta caa cgc tgt cag  
ttg gct ctg cag aat gtc tgt gac gat gtg gac aat gat gat gtc tct ttg aaa tcc ttt  
gag cct gca gtt ttg aaa caa gga gaa gaa att cat aat gag gtc gag ttt gag tgg ctg  
agg cag ttt tgg ttt caa ggc aat cga tac aga aag tgc act gac tgg tgg tgt caa ccg  
atg gct caa ctg gaa gca ctg tgg aag aag atg gag ggt gtg aca aat gct gtg ctt cat  
gaa gtt aaa aga gag ggg ctc ccc gtg gaa caa agg aat gaa atc ttg act gcc atc ctt  
gcc tgc ctc act gca cgc cag aac ctg agg aga gaa tgg cat gcc agg tgc cag tca cga  
att gcc cga aca tta cct gct gat cag aag cca gaa tgt cgg cca tac tgg gaa aag gat  
gat gct tgc atg cct ctg ccg ttt gac ctc aca gac atc gtt tca gaa ctc aga ggt cag  
gtt cga atc

**Figure S4.** Cloned coding sequence of *E. coli* AlkB and human FTO. Three extra guanines (underlined) were added to the sequence for cloning purposes, resulting in an extra glycine in the FTO translation product. The N-terminal FTO nuclear localization signal is shown in italics.

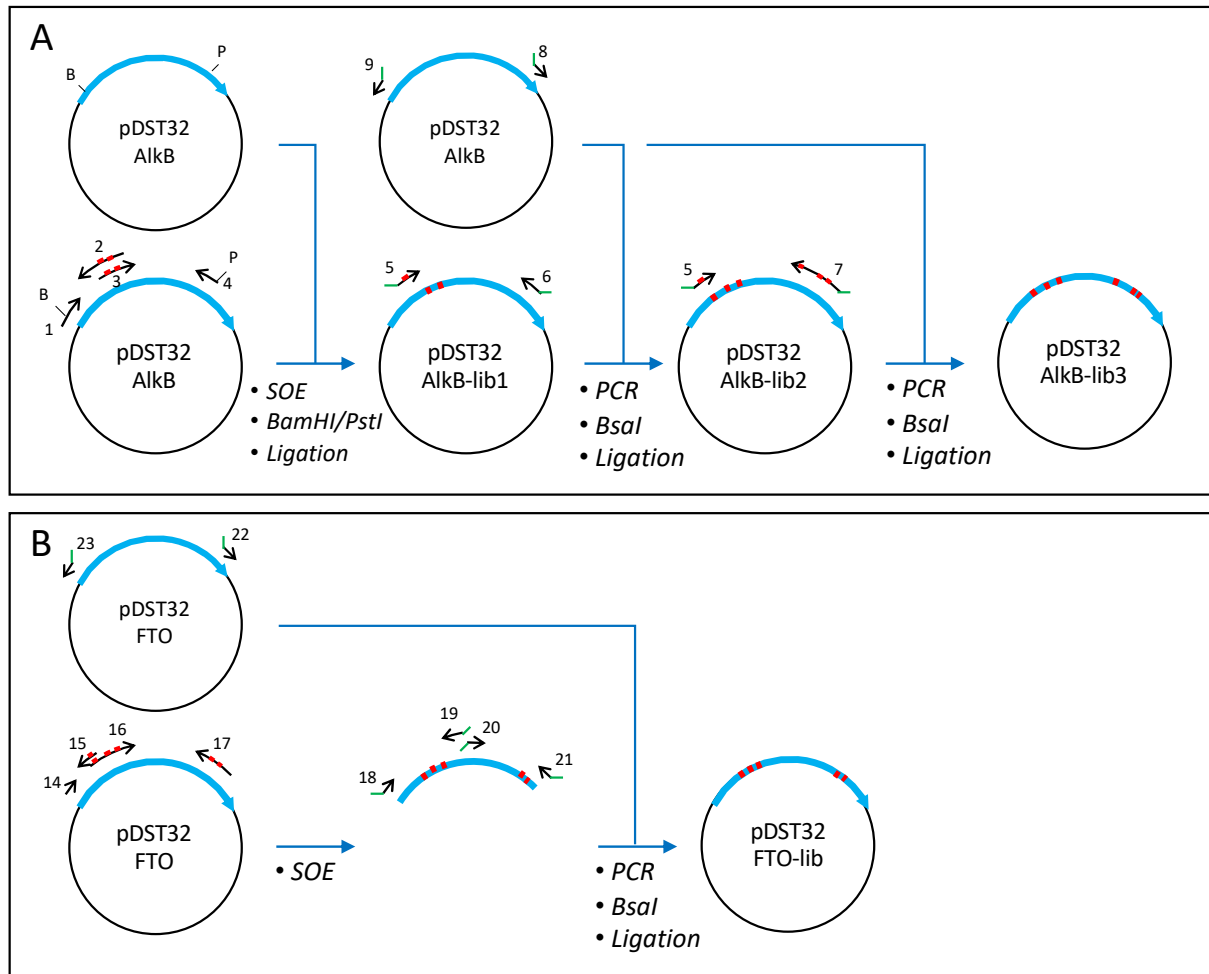

**Figure S5.** Construction schemes of AlkB (A) and FTO (B) libraries. AlkB and FTO libraries were created in three and two steps, respectively. Mutagenic fragments were generated by PCR using NNK- or TDK-randomized primers (see corresponding numbers in Table S4). Randomized codons are indicated in red. Randomized fragments were fused to ssgIII in phagemid pDST32 using BsaI-assisted restriction and ligation. BsaI-sites are indicated as green primer tails.

### A. Construction of wild-type pDST32-AlkB and combinatorial library

A synthetic *alkB* gene fragment (ThermoFisher Scientific) was cloned into phagemid pDST32 using PCR and BamHI/EcoRI restriction. After ligation, phagemids were transformed in *E. coli* and positives clones were verified using colony PCR and Sanger sequencing.

The first library (AlkB-lib1) was generated using overlap extension PCR [2]. First fragments were amplified in two separate PCR reactions, which were purified followed by splicing in a third reaction. Both fragments were mixed and end-filled. After 15 cycles, extra primers containing the restriction sites (primer 1 and 4) were added and the reaction was continued for 15 cycles. The resulting gene fragment was then cloned in pDST32 using BamHI/EcoRI restriction. A combinatorial library was achieved containing all 120 different clones. Next, the first library served as input for the second library (AlkB-lib2). An insert with one extra mutation (primer 5) was amplified by PCR (using primers containing BsaI overhangs (Table S4)), restricted by BsaI (NEB) and ligated. After transformation in *E. coli*,  $10^5$  clones were obtained, which is less than the  $1.6 \times 10^7$  possible protein-coding combinations. Finally, this second library served as input for the construction of library 3 (AlkB-lib3) in a similar process,

in which 3 extra randomized sites were introduced. After final transformation,  $5 \times 10^5$  TG1 clones were obtained, serving as starting point for phage display. After each transformation step, efficiency of cloning was estimated by the length of PCR products from 30 random clones using *alkB*-specific primers. Randomization at the target positions was verified using Sanger sequencing.

### **B. Construction of wild-type pDST32-FTO and combinatorial library**

A synthetic gene block of full-length *FTO* sequence (IDT) was cloned into phagemid pDST32 by Gibson assembly [1] using *FTO* and pDST32-specific overlapping primers (primers 10-13, Table S4). The assembled phagemids were transformed in *E. coli* and positives clones were verified using colony PCR and Sanger sequencing.

First, a 741 bp randomized *FTO* fragment was generated by overlap extension PCR [2] of two smaller PCR products, using NNK/TDK-randomized primers (primer 14-17) and wild-type pDST32-FTO as template. This randomized *FTO* fragmented was amplified together with the pDST32-vector PCR fragment using overlapping *BsaI*-containing primers (primers 18-21). The two PCR products were restricted by *BsaI* (and *DpnI* to remove the parental pDST32-FTO phagemid), ligated and transformed into *E. coli*. Notably, phagemids were first transformed into *E. coli* (Lucigen) cells due to its better transformation efficiency, obtaining  $2.2 \times 10^6$  independent clones, which is more than the  $8 \times 10^5$  possible protein-coding combinations. Subsequently, phagemids were isolated and retransformed into TG1 strains resulting in a library of  $6 \times 10^6$  clones, which served as starting point for phage display.

After each transformation step, efficiency of cloning was estimated by PCR of 30 random clones using *FTO*-specific primers. Randomization at the target positions was verified using Sanger sequencing.

[1] D.G. Gibson, L. Young, R.Y. Chuang, J.C. Venter, C.A. Hutchison, H.O. Smith, Enzymatic assembly of DNA molecules up to several hundred kilobases, *Nat Methods* 6 (2009) 343-345. 10.1038/nmeth.1318.

[2] E.M. Williams, J.N. Copp, D.F. Ackerley, Site-saturation mutagenesis by overlap extension PCR, *Methods Mol Biol* 1179 (2014) 83-101. 10.1007/978-1-4939-1053-3\_6.

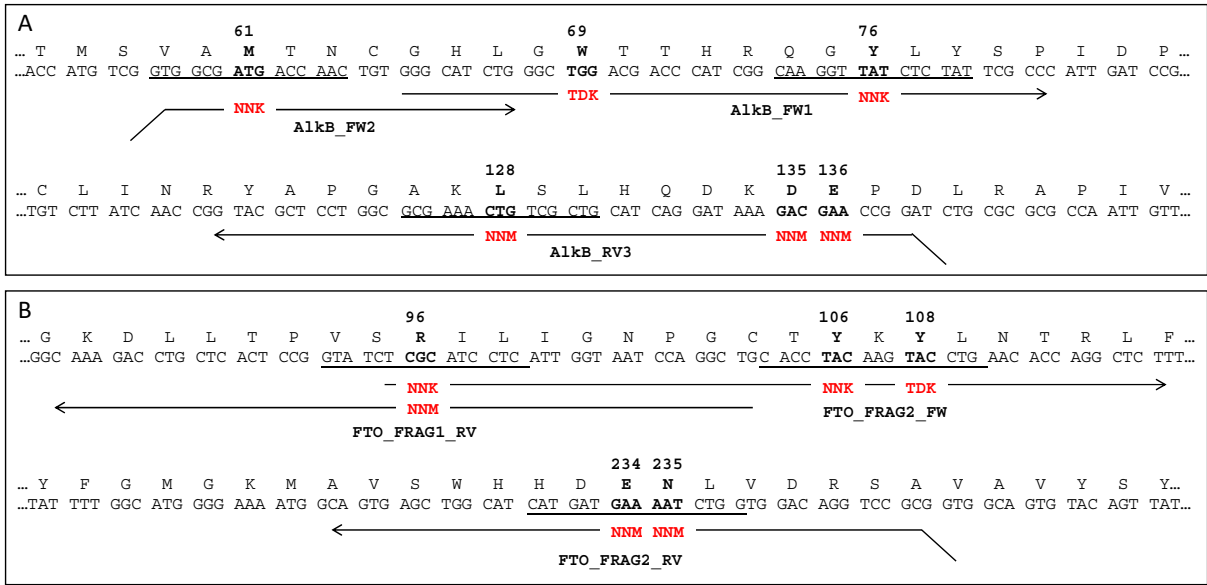

**Figure S6.** Detailed overview of the targeted regions and randomized codons in *alkB* (A) and *FTO* (B). Target codons are clustered in two distinct areas. Mutagenic primers (see Table S4) are shown with randomized triplets in red. Underlined sequences were used as in silico selection criteria of reads containing the targeted region (see Table S1).



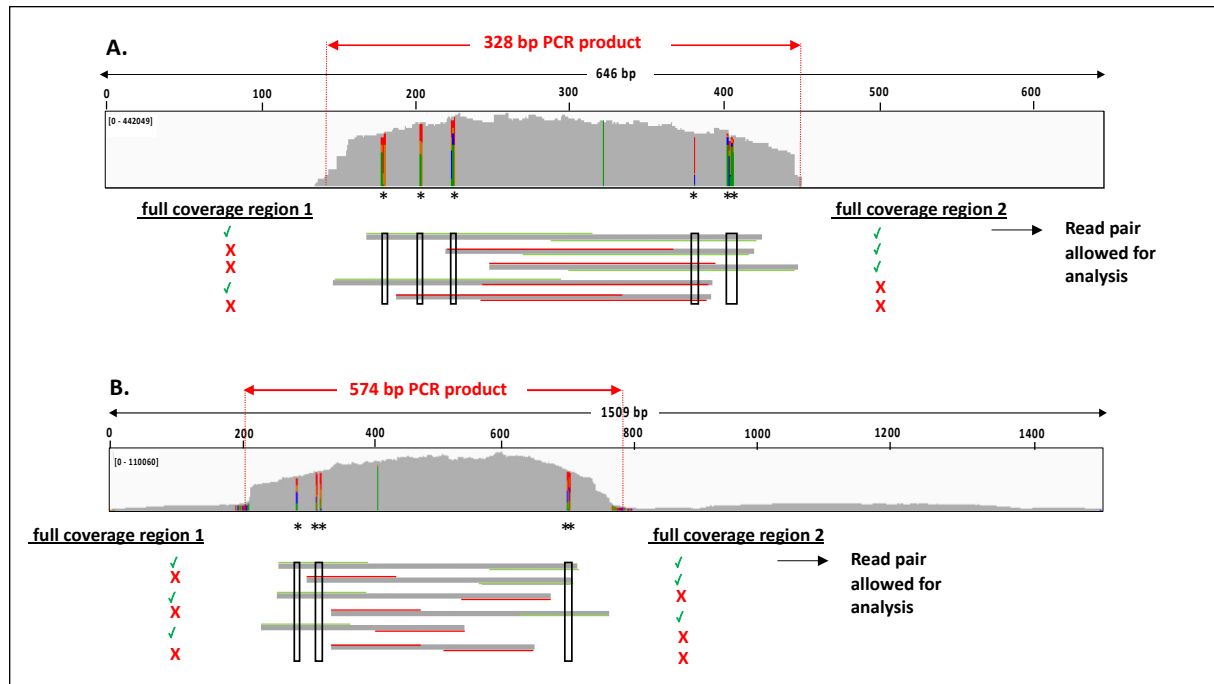

**Figure S7.** Sequence coverage of the *alkB* (A) and *FTO* (B) gene after deep sequencing of tagged PCR-amplified target regions (red arrows) of naive library samples. The sequence coverage was calculated after read processing (quality/adaptor trimming, pairing) and alignment with the total gene. The image was generated by IGV. Randomized codon positions are indicated with asterisks (\*). Green bars represent silent point mutations introduced to remove BamHI and BsaI restriction sites in *alkB* and *FTO*, respectively. Below the sequence coverage diagram, a cartoon of paired read selection is added. Tagmented fragments (grey lines) vary in length (250-500 bp) and starting position. Illumina sequencing of these fragments yielded 150 bp paired-end reads, either fully (green lines) or incompletely (red lines) covering the randomized regions. Read pairs covering both randomized regions were filtered for further analysis.

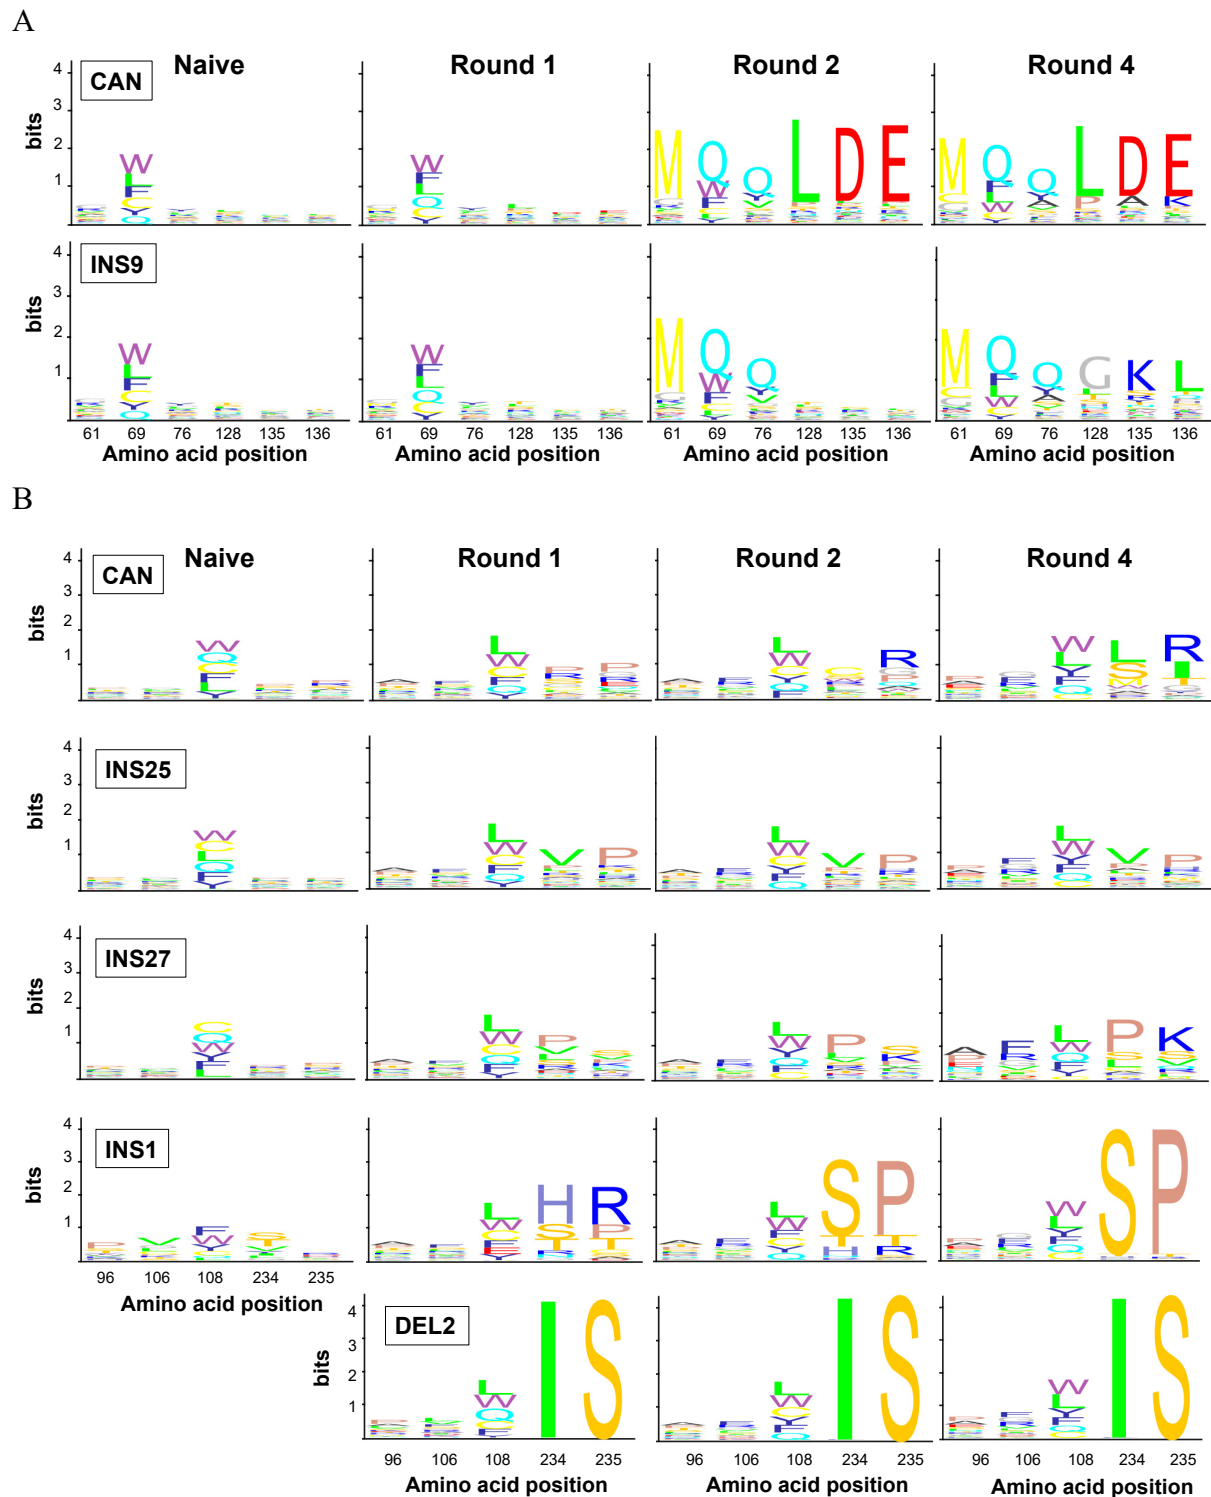

**Figure S8.** Evolution of amino acids at randomized positions in AlkB and FTO during biopanning as deduced from Illumina DNA sequence reads. A. Sequences logos of canonical (CAN) AlkB clones and insertion variant INS9 at the six randomized positions. B. Sequences logos of canonical (CAN) FTO, insertion mutants INS25, INS27, INS1 and deletion mutant DEL2 at the five randomized positions. Triplet 69 in AlkB and triplet 108 in FTO were TDK-randomized. All other triplets were NNK-randomized. Amber stop codons can be suppressed as Gln, represented as Q.

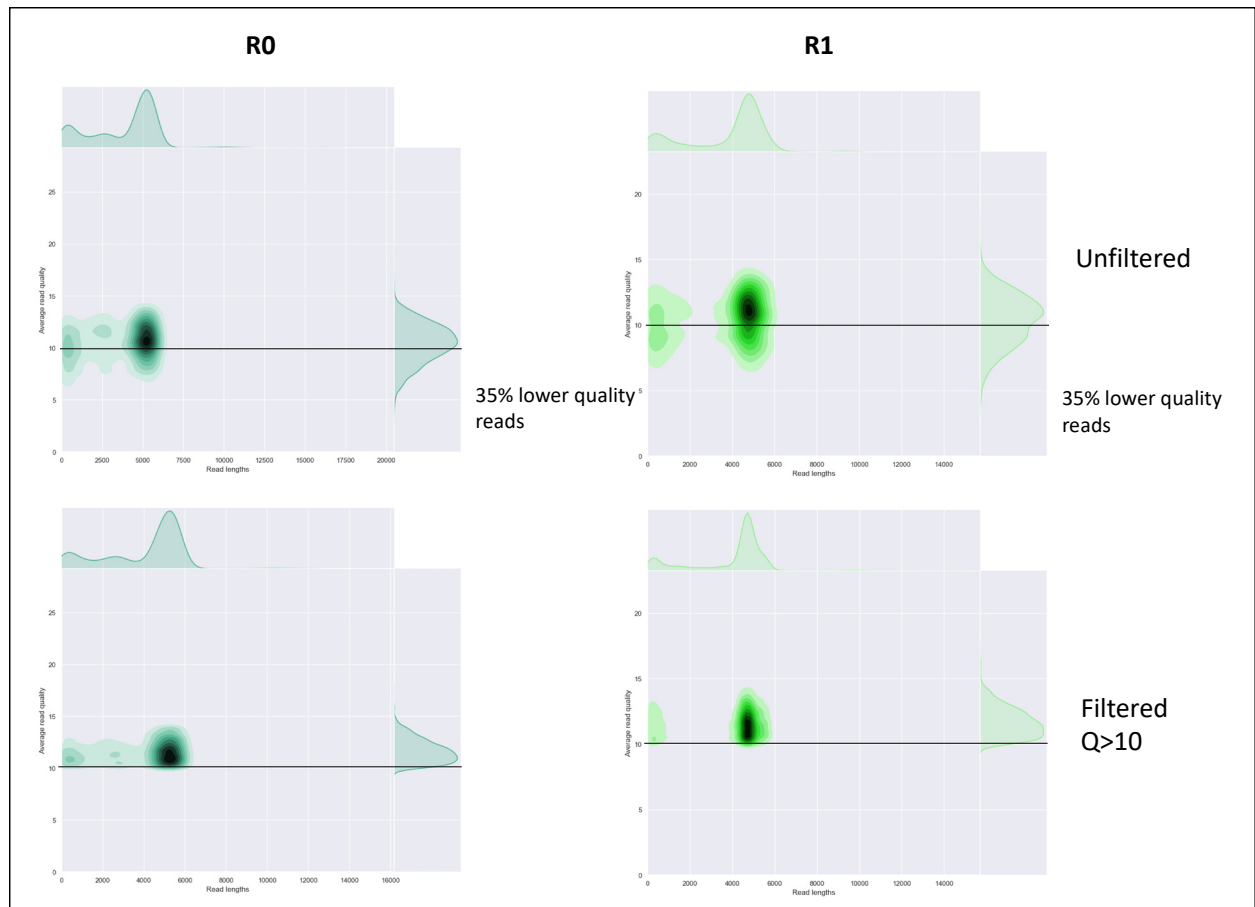

**Figure S9.** NanoPlot bivariate plot of linearized pDST32-FTO nanopore read lengths against average read quality. Low-quality reads (with Phred score < 10) were filtered out using NanoFilt prior to alignment and sequence coverage calculation.

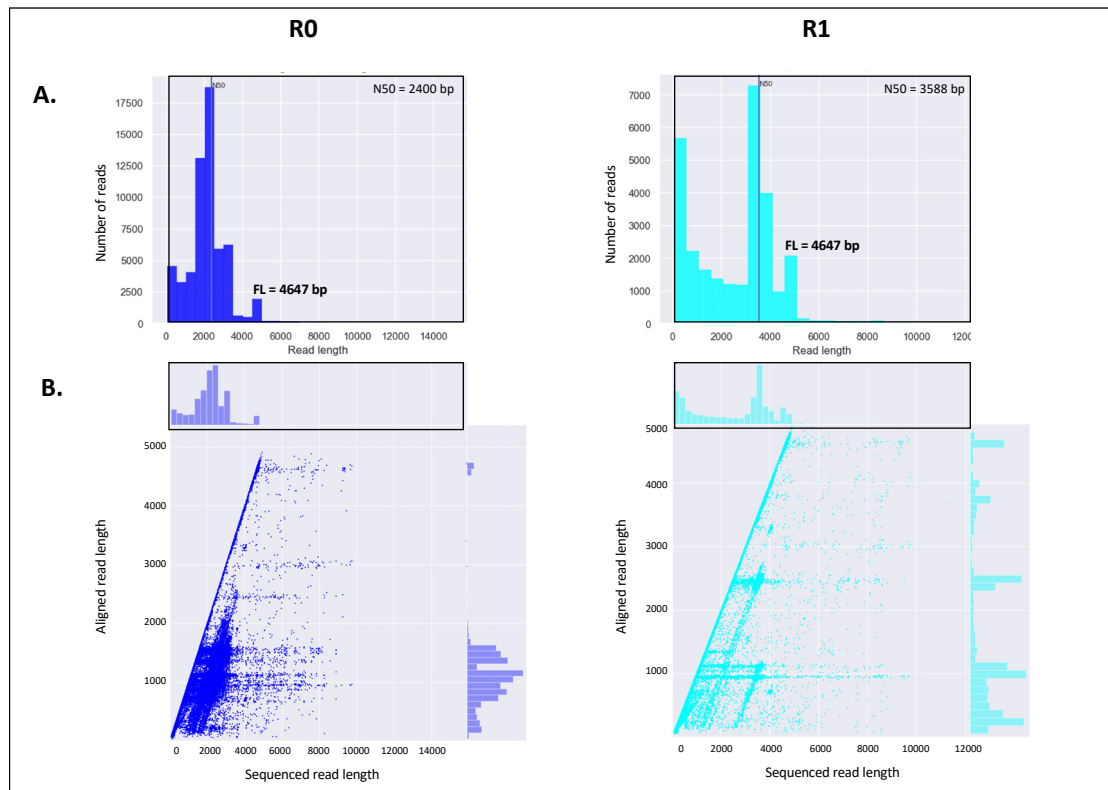

**Figure S10.** A. NanoPlot histogram of raw nanopore read lengths of naive (R0; blue) and round 1 (R1; cyan) AlkB phagemid libraries and N50 value. B. Bivariate Nanoplot of sequenced read lengths against aligned read lengths.

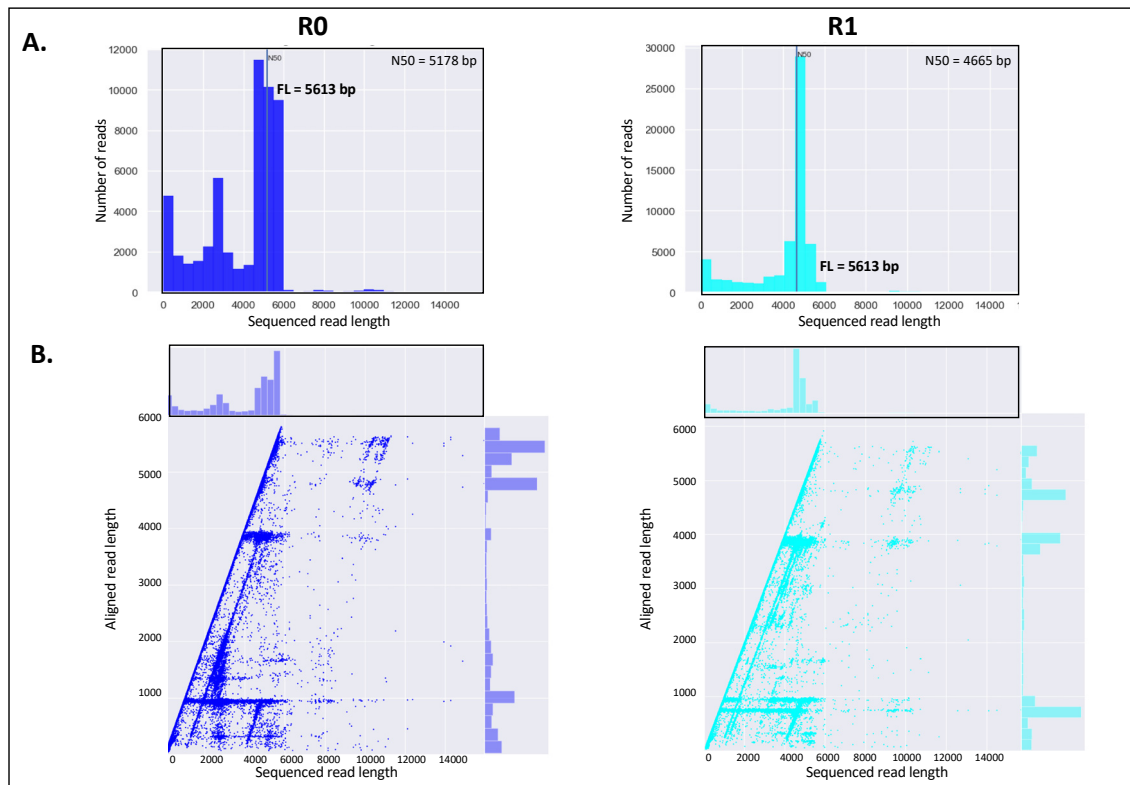

**Figure S11.** A. NanoPlot histogram of raw nanopore read lengths of naive (R0; blue) and round 1 (R1; cyan) FTO phagemid libraries and N50 value. B. Bivariate Nanoplot of sequenced read lengths against aligned read lengths.

**Table S1.** Absolute numbers of sequence reads and read pairs in consecutive steps of FASTQ processing.

|         | Total   |         | After adapter trimming |         | After quality trimming |         | After region 1 selection | After region 2 selection | Total paired reads | Paired reads per variant |        |  |  |  |
|---------|---------|---------|------------------------|---------|------------------------|---------|--------------------------|--------------------------|--------------------|--------------------------|--------|--|--|--|
|         | FW      | RV      | FW                     | RV      | FW                     | RV      |                          |                          |                    | CAN                      | INS9   |  |  |  |
| AlkB    |         |         |                        |         |                        |         |                          |                          |                    |                          |        |  |  |  |
| Naive   | 3957987 | 3957987 | 3949653                | 3949653 | 3824881                | 3808766 | 761644                   | 861706                   | 761541             | 578101                   | 131130 |  |  |  |
| Round 1 | 1208801 | 1208801 | 1208200                | 1208200 | 1166292                | 1160798 | 152168                   | 160860                   | 151953             | 124990                   | 21489  |  |  |  |
| Round 2 | 1734031 | 1734031 | 1733606                | 1733606 | 1659914                | 1642102 | 140761                   | 154983                   | 140577             | 121260                   | 5217   |  |  |  |
| Round 4 | 1272582 | 1272582 | 1271907                | 1271907 | 1211839                | 1196942 | 128364                   | 178172                   | 128364             | 110121                   | 5499   |  |  |  |

|         | Total   |         | After adapter trimming |         | After quality trimming |         | After region 1 selection | After region 2 selection | Total paired reads | Paired reads per variant |       |       |      |      |
|---------|---------|---------|------------------------|---------|------------------------|---------|--------------------------|--------------------------|--------------------|--------------------------|-------|-------|------|------|
|         | FW      | RV      | FW                     | RV      | FW                     | RV      |                          |                          |                    | CAN                      | INS25 | INS27 | INS1 | DEL2 |
| FTO     |         |         |                        |         |                        |         |                          |                          |                    |                          |       |       |      |      |
| Naive   | 1818864 | 1818864 | 1818686                | 1817867 | 1736177                | 1723569 | 115477                   | 162972                   | 115191             | 77968                    | 1216  | 167   | 15   | 0    |
| Round 1 | 1694336 | 1694336 | 1694143                | 1693343 | 1617091                | 1597115 | 107555                   | 137042                   | 106962             | 30581                    | 21259 | 655   | 810  | 65   |
| Round 2 | 1674584 | 1674584 | 1674413                | 1673769 | 1623503                | 1605470 | 65062                    | 83117                    | 64156              | 10713                    | 16190 | 456   | 1667 | 1069 |
| Round 4 | 1491956 | 1491956 | 1491824                | 1491415 | 1443901                | 1429849 | 9977                     | 14132                    | 9453               | 543                      | 2693  | 48    | 761  | 699  |

Two data sets containing reads from either forward (FW) or reverse (RV) sequencing primers were adapter- and quality-trimmed. Next, region selection was performed using the presence of targeted sequences (underlined in Figure S6) as filter criteria. Finally, reads were paired and the individual counts for each variant determined.

**Table S2.** Frequency evolution of most prominent AlkB and FTO amino acid patterns deduced from deep sequencing reads in different selection rounds.

| AlkB<br>patterns | Naive (%) |       | Round 1 (%) |       | Round 2 (%) |       | Round 4 (%) |        |
|------------------|-----------|-------|-------------|-------|-------------|-------|-------------|--------|
|                  | CAN       | INS9  | CAN         | INS9  | CAN         | INS9  | CAN         | INS9   |
| M*QLDE           | 0.001     | 0     | 0.262       | 0     | 27.983      | 0     | 23.175      | 0      |
| CLALDE           | 0.001     | 0     | 0.034       | 0     | 0.381       | 0     | 5.704       | 0      |
| M*QPAK           | 0         | 0     | 0.010       | 0     | 0.215       | 0     | 3.379       | 0      |
| MWYLDE           | 0.003     | 0     | 0.139       | 0     | 3.739       | 0     | 3.267       | 0      |
| M*QGKL           | 0         | 0.001 | 0           | 0.014 | 0           | 2.147 | 0           | 19.240 |

  

| FTO<br>patterns | Naive (%) |       |       |      |      | Round 1 (%) |       |       |       |       | Round 2 (%) |       |       |        |        | Round 4 (%) |       |        |        |        |
|-----------------|-----------|-------|-------|------|------|-------------|-------|-------|-------|-------|-------------|-------|-------|--------|--------|-------------|-------|--------|--------|--------|
|                 | CAN       | INS25 | INS27 | INS1 | DEL2 | CAN         | INS25 | INS27 | INS1  | DEL2  | CAN         | INS25 | INS27 | INS1   | DEL2   | CAN         | INS25 | INS27  | INS1   | DEL2   |
| AFLPP           | 0.003     | 0     | 0     | 0    | /    | 1.027       | 0.080 | 0.611 | 0     | 0     | 0.569       | 0.117 | 1.096 | 0      | 0      | 0.184       | 0     | 0      | 0      | 0      |
| AFLRG           | 0.001     | 0     | 0     | 0    | /    | 0.755       | 0.005 | 0     | 0     | 0     | 0.252       | 0.006 | 0     | 0      | 0      | 0           | 0     | 0      | 0      | 0      |
| AFLLR           | 0.001     | 0     | 0     | 0    | /    | 0.069       | 0.056 | 0     | 0     | 0     | 0.140       | 0.111 | 0     | 0      | 0      | 4.236       | 0.149 | 0      | 0      | 0      |
| EGWLR           | 0.001     | 0     | 0     | 0    | /    | 0           | 0     | 0     | 0     | 0     | 0.047       | 0.031 | 0     | 0      | 0      | 3.867       | 0.037 | 0      | 0      | 0      |
| AFLVP           | 0         | 0     | 0     | 0    | /    | 0.016       | 4.445 | 0     | 0     | 0     | 0.009       | 4.379 | 0     | 0      | 0      | 0           | 3.973 | 0      | 0      | 0      |
| AFLPK           | 0         | 0     | 0     | 0    | /    | 0           | 0.005 | 1.069 | 0     | 0     | 0           | 0     | 3.070 | 0      | 0      | 0           | 0     | 16.667 | 0      | 0      |
| AFLSP           | 0         | 0     | 0     | 0    | /    | 0.893       | 0.066 | 0     | 2.716 | 0     | 0.504       | 0.093 | 0.219 | 13.017 | 0      | 0           | 0     | 2.083  | 12.089 | 0      |
| AFLIS           | 0         | 0     | 0     | 0    | /    | 0           | 0     | 0     | 0     | 6.154 | 0           | 0     | 0     | 0      | 13.377 | 0           | 0     | 0      | 0      | 13.162 |

The patterns are represented by the sequence of the randomized amino acid residues without the intervening untargeted amino acids. CAN: canonical sequences devoid of observed indels; INS and DEL genotypes (Figure 2). The percentages are calculated by the fraction of each patterns from the total number of amino acid patterns for each variant. A zero-percentage means that the corresponding patterns could not be detected among all patterns for a certain variant. FTO mutant DEL2 was absent in the naive library. Hence, no patterns are presented (indicate as /). The first four FTO patterns were most frequent in the canonical clones; the

next four patterns most frequent in each of the four indel clones. MWYLDE corresponds to the AlkB wild-type pattern. The wild-type FTO pattern (RYYEN) was not detected.



**Table S3.** Observed *alkB* and *FTO* genotype frequencies and diversities of enriched canonical phenotypes.

| <b>A. AlkB</b>            |                    | <b>Genotype frequency (%)</b> |                |                |                |
|---------------------------|--------------------|-------------------------------|----------------|----------------|----------------|
| <b>Phenotype</b>          | <b>Genotype</b>    | <b>Naive</b>                  | <b>Round 1</b> | <b>Round 2</b> | <b>Round 4</b> |
| <b>M*QLDE</b>             | ATGTAGCAGCTGGACGAA | 0.0009                        | 0.3160         | 32.4039        | 26.9286        |
|                           | ATGTAGCAGCTTGACGAA | 0                             | 0.0016         | 0.0107         | 0.0036         |
|                           | ATGTAGCAACTGGACGAA | 0                             | 0              | 0.0066         | 0.0009         |
|                           | ATGTAGCAGCTGGATGAA | 0                             | 0              | 0.0058         | 0.0036         |
|                           | ATGTAACAGCTGGACGAA | 0                             | 0              | 0.0041         | 0.0027         |
|                           | ATGTAGCAGCTAGACGAA | 0                             | 0              | 0.0033         | 0.0018         |
|                           | ATGTAGCAGCTGGACGAG | 0                             | 0              | 0.0025         | 0.0073         |
|                           | ATGTAGCAGCTCGACGAA | 0                             | 0              | 0.0016         | 0.0200         |
|                           | ATGTAGCAGCTNGACGAA | 0                             | 0              | 0.0008         | 0.0009         |
|                           | ATGTAGCAGTTGGACGAA | 0                             | 0.0008         | 0.0008         | 0.0027         |
|                           | ATGTAGCAGTTGGATGAG | 0                             | 0              | 0.0008         | 0              |
| <b>Genotype diversity</b> |                    | <b>1</b>                      | <b>3</b>       | <b>11</b>      | <b>10</b>      |
| <b>M*QPAK</b>             | ATGTAGCAGCCGGCTAAG | 0.0002                        | 0.0120         | 0.2441         | 3.923          |
|                           | ATGTAGCAGCCGGCGAAG | 0                             | 0              | 0.0041         | 0.0018         |
|                           | ATGTAACAGCCGGCTAAG | 0                             | 0              | 0              | 0.0018         |
|                           | ATGTAGCAGCCTGCTAAG | 0                             | 0              | 0              | 0.0018         |
|                           | ATGTAGCAACCGGCTAAG | 0                             | 0              | 0              | 0.0009         |
|                           | ATGTAGCAGCCCGCTAAG | 0                             | 0              | 0              | 0.0009         |
|                           | ATGTAGCAGCCGGCCAAG | 0                             | 0              | 0              | 0.0009         |
|                           | ATGTAGCAGCCGGCTAAA | 0                             | 0              | 0              | 0.0009         |
|                           | ATGTAGCAGCCNGCTAAG | 0                             | 0              | 0              | 0.0009         |
| <b>Genotype diversity</b> |                    | <b>1</b>                      | <b>1</b>       | <b>2</b>       | <b>9</b>       |
| <b>MWYLDE</b>             | ATGTGGTATCTGGACGAA | 0.0047                        | 0.168          | 4.3295         | 3.794          |
|                           | ATGTGGTATCTCGACGAA | 0.0002                        | 0.0008         | 0.0016         | 0.0027         |
|                           | ATGTGGTATCTAGACGAA | 0                             | 0              | 0.0008         | 0.0018         |
|                           | ATGTGGTATCTGGATGAA | 0                             | 0              | 0.0008         | 0.0018         |
|                           | ATGTGGTATCTTGACGAA | 0                             | 0              | 0.0008         | 0.0009         |
|                           | ATGTGGTATTTGGACGAA | 0                             | 0              | 0.0008         | 0.0009         |
| <b>Genotype diversity</b> |                    | <b>2</b>                      | <b>2</b>       | <b>6</b>       | <b>6</b>       |
| <b>CLALDE</b>             | TGTTTGGCTCTGGACGAA | 0.0014                        | 0.0400         | 0.4371         | 6.6200         |
|                           | TGCTTGGCTCTGGACGAA | 0                             | 0.0008         | 0              | 0              |
|                           | TGTTTGGCGCTGGACGAA | 0                             | 0              | 0.0041         | 0.0054         |
|                           | TGTTTGGCTCTCGACGAA | 0                             | 0              | 0              | 0.0064         |
|                           | TGTTTGGCTCTAGACGAA | 0                             | 0              | 0              | 0.0018         |
|                           | TGTTTGGCTTTGGACGAA | 0                             | 0              | 0              | 0.0018         |
|                           | TGTTTAGCTCTGGACGAA | 0                             | 0              | 0              | 0.0009         |
|                           | TGTTTGGCCCTGGACGAA | 0                             | 0              | 0              | 0.0009         |
|                           | TGTTTGGCTCTGGACGAG | 0                             | 0              | 0              | 0.0009         |
|                           | TGTTTGGCTCTNGACGAA | 0                             | 0              | 0              | 0.0009         |
| <b>Genotype diversity</b> |                    | <b>1</b>                      | <b>2</b>       | <b>2</b>       | <b>9</b>       |

| B. FTO             |                 | Genotype frequency (%) |         |         |         |
|--------------------|-----------------|------------------------|---------|---------|---------|
| phenotype          | genotype        | naive                  | round 1 | round 2 | round 4 |
| AFLPP              | GCGTTTTTGCCTCCG | 0.0013                 | 0       | 0       | 0       |
|                    | GCTTTTTTGCCTCCG | 0.0013                 | 0.0294  | 0.2894  | 0       |
|                    | GCTTTTTTGCCGCCT | 0                      | 0.4218  | 0.0933  | 0       |
|                    | GCTTTTTTGCCTCCT | 0                      | 0.3597  | 0.0653  | 0       |
|                    | GCTTTTTTGCCGCCG | 0                      | 0.2158  | 0.1213  | 0.1842  |
| Genotype diversity |                 | 2                      | 4       | 4       | 1       |
| AFLRG              | GCTTTTTTGAGGGGT | 0                      | 0.7161  | 0.2520  | 0       |
|                    | GCTTTTTTGCGGGGG | 0.0013                 | 0.0164  | 0       | 0       |
|                    | GCTTTTTTGCGTGGG | 0                      | 0.0098  | 0       | 0       |
|                    | GCTTTTTTGAGGGGC | 0                      | 0.0033  | 0       | 0       |
|                    | GCTTTTTTGAGGGGG | 0                      | 0.0033  | 0       | 0       |
|                    | GCTTTTTTGCGGGGT | 0                      | 0.0033  | 0       | 0       |
|                    | GCTTTTTTGCGTGGT | 0                      | 0.0033  | 0       | 0       |
| Genotype diversity |                 | 1                      | 7       | 1       | 0       |
| AFLLR              | GCTTTTTTGTTGCGG | 0.0013                 | 0       | 0.0187  | 0       |
|                    | GCTTTTTTGTTGCGT | 0                      | 0.0262  | 0.0280  | 4.2357  |
|                    | GCTTTTTTGCTGAGG | 0                      | 0.0196  | 0.0560  | 0       |
|                    | GCTTTTTTGCTGCGG | 0                      | 0.0131  | 0       | 0       |
|                    | GCTTTTTTGCTGCGT | 0                      | 0.0033  | 0.0373  | 0       |
|                    | GCTTTTTTGCTTCGG | 0                      | 0.0033  | 0       | 0       |
|                    | GCTTTTTTGCTTCGT | 0                      | 0.0033  | 0       | 0       |
| Genotype diversity |                 | 1                      | 6       | 4       | 1       |
| EGWLR              | GAGGGTTGGCTTCGG | 0.0013                 | 0       | 0       | 0       |
|                    | GAGGGTTGGTTGCGT | 0                      | 0       | 0.0373  | 3.8674  |
|                    | GAGGGTTGGCTGAGG | 0                      | 0       | 0.0093  | 0       |
| Genotype diversity |                 | 1                      | 0       | 2       | 1       |

**Table S4.** Oligonucleotides used in this study.

| #  | Primer name       | Sequence (5' > 3')                                                                  |
|----|-------------------|-------------------------------------------------------------------------------------|
| 1  | AlkB_BamHI_FW     | TGGT <b>GGATCC</b> ATGTTGGATCTGTTGCCGATGC                                           |
| 2  | AlkB_FW1          | GGGCATCTGGGCT <u>TDK</u> ACGACCCATCGGCAAGGT <u>NNK</u> CTCTATTCGCCCAT               |
| 3  | AlkB_RV1          | CGGCGAATAGAG <u>MNN</u> ACCTTGCCGATGGGTCGT <u>MHA</u> GC                            |
| 4  | AlkB_PstI_RV      | TTCGGCT <b>GCAG</b> ATTCTTTTTACCTGCCTGACGG                                          |
| 5  | AlkB_FW2          | TCCGGTCTCTGGCG <u>NNK</u> ACCAACTGTGGGCATCTG                                        |
| 6  | AlkB_RV2          | TCCGGTCTCTCCGGTTCGTCTTTATCCTGATGCAGCGACAGTTTCGCGCCAGGAGCGTAG                        |
| 7  | AlkB_RV3          | TCCGGTCTCTCCGG <u>MNNMNN</u> TTTATCCTGATGCAGCGA <u>MNN</u> TTTCGCGCCAGGAGCGTAG      |
| 8  | AlkB_VEC_FW       | TCCGGTCTCACCGGATCTGCGCGCGCCAATTGTTTCTG                                              |
| 9  | AlkB_VEC_RV       | TCCGGTCTCACGCCACCGACATGGTATATC                                                      |
| 10 | FTO_FRAG_GIB_FW   | CATCGGCGGACTACAAAGATGGATCCATGGGGAAGCGCA                                             |
| 11 | FTO_FRAG_GIB_RV   | TCAGAGATCAGCTTCTGCTCGAATTCCTCGAGGGGTTTGTCT                                          |
| 12 | FTO_VEC_GIB_FW    | CAAAACCCCTCGAGGAATTCGAGCAGAAGCTGATCTCTGAG                                           |
| 13 | FTO_VEC_GIB_RV    | GTGCGCTTCCCCATGGATCCATCTTTGTAGTCCGCCG                                               |
| 14 | FTO_FRAG1_FW      | CATCGGCGGACTACAAAGATGGATCCATGGGGAAGCGCA                                             |
| 15 | FTO_FRAG1_RV      | CCTGGATTACCAATGAGGAT <u>MNN</u> AGATACCGGAGTGAGCAGGTCTTTG                           |
| 16 | FTO_FRAG2_FW      | <u>TNNK</u> ATCCTCATTGGTAATCCAGGCTGCACC <u>NNK</u> AAG <u>TDK</u> CTGAACACCAGGCTCTT |
| 17 | FTO_FRAG2_RV      | GCGGACCTGTCCACCAG <u>MNNMNN</u> ATCATGATGCCAGCTCACTG                                |
| 18 | FTO_BSAI_REG1_FW  | ACAGGTCTCGGATCCATGGGGAAGCGCAC                                                       |
| 19 | FTO_BSAI_REG1_RV  | ATCGGTCTCGTTTACAAGCAGCGGCTATTTAGCC                                                  |
| 20 | FTO_BSAI_REG2_FW  | TAGGGTCTCTGAAACCTTCCTCAAGCTCAATGAC                                                  |
| 21 | FTO_BSAI_REG2_RV  | GAAGGTCTCCGCGACCTGTCCACCAG                                                          |
| 22 | FTO_BSAI_VEC_FW   | GTAGGTCTCTCCGCGGTGGCAGTGACAG                                                        |
| 23 | FTO_BSAI_VEC_RV   | CACGGTCTCGGATCCATCTTTGTAGTCCGCC                                                     |
| 24 | FTO_NGS_FW        | CTTTCTCACACTGCACAAG                                                                 |
| 25 | FTO_NGS_RV        | GTCATCCTCACTTTCCTC                                                                  |
| 26 | AlkB_NGS_FW       | CGCCGTTTCGCCAGATGGTCAC                                                              |
| 27 | AlkB_NGS_RV       | ATCGCGGGTAAGCCCAGAGAAACAG                                                           |
| 28 | pDST32_qPCR_FW    | TCATTAAGCATTCTGCCGAC                                                                |
| 29 | pDST32_qPCR_RV    | GTTTTTCGTCTCAGCCAATC                                                                |
| 30 | M13KO7_qPCR_FW    | TACTGATTACGGTGCTATC                                                                 |
| 31 | M13KO7_qPCR_RV    | GACTTGAGCCATTTGGGAATT                                                               |
| 32 | m6A target oligo  | (biotinTEG)AAAAAGCGG(m6A)CTCCAGATG                                                  |
| 33 | m6A competitor    | AAAAAGCGGACTCCAGATG                                                                 |
| 34 | m1A target oligo  | TAGGTAA(m1A)ACCGTTCCTAGTCCATCTCAGC                                                  |
| 35 | m1A capture oligo | (biosg-iSp18)GCTGAGATGGACT                                                          |
| 36 | m1A competitor    | TAGGTAAAACCGTTCCTAGTCCATCTCAGC                                                      |

Randomized triplets are underlined. BamHI, PstI and BsaI sites are in bold. Biotin-TEG indicates biotin coupled via a triethyleneglycol (TEG) spacer; biosg-iSp18 indicates biotin coupled via a C18 internal spacer.
